# Supplementary material for: Assessing NARCCAP climate model effects using spatial confidence regions
Source: Copernicus journal article supplement (doi:10.5194/ascmo-3-67-2017), 2017-07-14
Supplement: Supplementary file [file ascmo-3-67-2017-supplement-title-page.pdf › ascmo-3-67-2017-supplement-title-page.pdf]

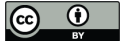

## *Supplement of*

# **Assessing NARCCAP climate model effects using spatial confidence regions**

**Joshua P. French et al.**

*Correspondence to:* Joshua P. French ([joshua.french@ucdenver.edu](mailto:joshua.french@ucdenver.edu))

- [ascmo-3-67-2017-supplement-title-page.pdf](#)
- analysis
  - .DS\_Store
  - .Rapp.history
  - .Rhistory
  - 00\_notes.R
  - 01\_diagnostics\_fit\_models\_bias.R
  - 02\_diagnostics\_continuous\_bias.R
  - 03\_diagnostics\_normal\_bias.R
  - 04\_diagnostics\_independence\_bias.R
  - 05\_diagnostics\_aic\_bias.R
  - 06\_construct\_V.R
  - 07\_std\_apl\_bias.R
  - 08\_std\_asl\_bias.R
  - 09\_std\_ipl\_bias.R
  - 10\_std\_isl\_bias.R
  - 11\_cope\_apl\_bias.R
  - 12\_cope\_asl\_bias.R
  - 13\_cope\_ipl\_bias.R
  - 14\_cope\_isl\_bias.R
  - 15\_plot\_spatial\_domain.R
  - 16\_apl\_plots.R
  - 17\_asl\_plots.R
  - 18\_plot\_delta\_ipl.R

- 19\_plot\_delta\_isl.R
- 20\_model\_rankings.R
- 21\_plot\_std\_ipl\_bias.R
- 22\_plot\_cope\_ipl\_bias.R
- 23\_plot\_std\_isl\_bias.R
- 24\_plot\_cope\_isl\_bias.R
- 25\_p\_table.R
- aux\_funcs.R
- cope\_0.2.5.tar.gz
- narccap\_grid.rda
- narccap\_mask.rda
- tmax\_summer.rda
- tmax\_summer\_covar.rda

The copyright of individual parts of the supplement might differ from the CC BY 3.0 License.
